# Supplementary figures and images for: A parameter-free statistical test for neuronal responsiveness
Source: eLife journal article supplement (doi:10.7554/elife.71969), 2021-09-27

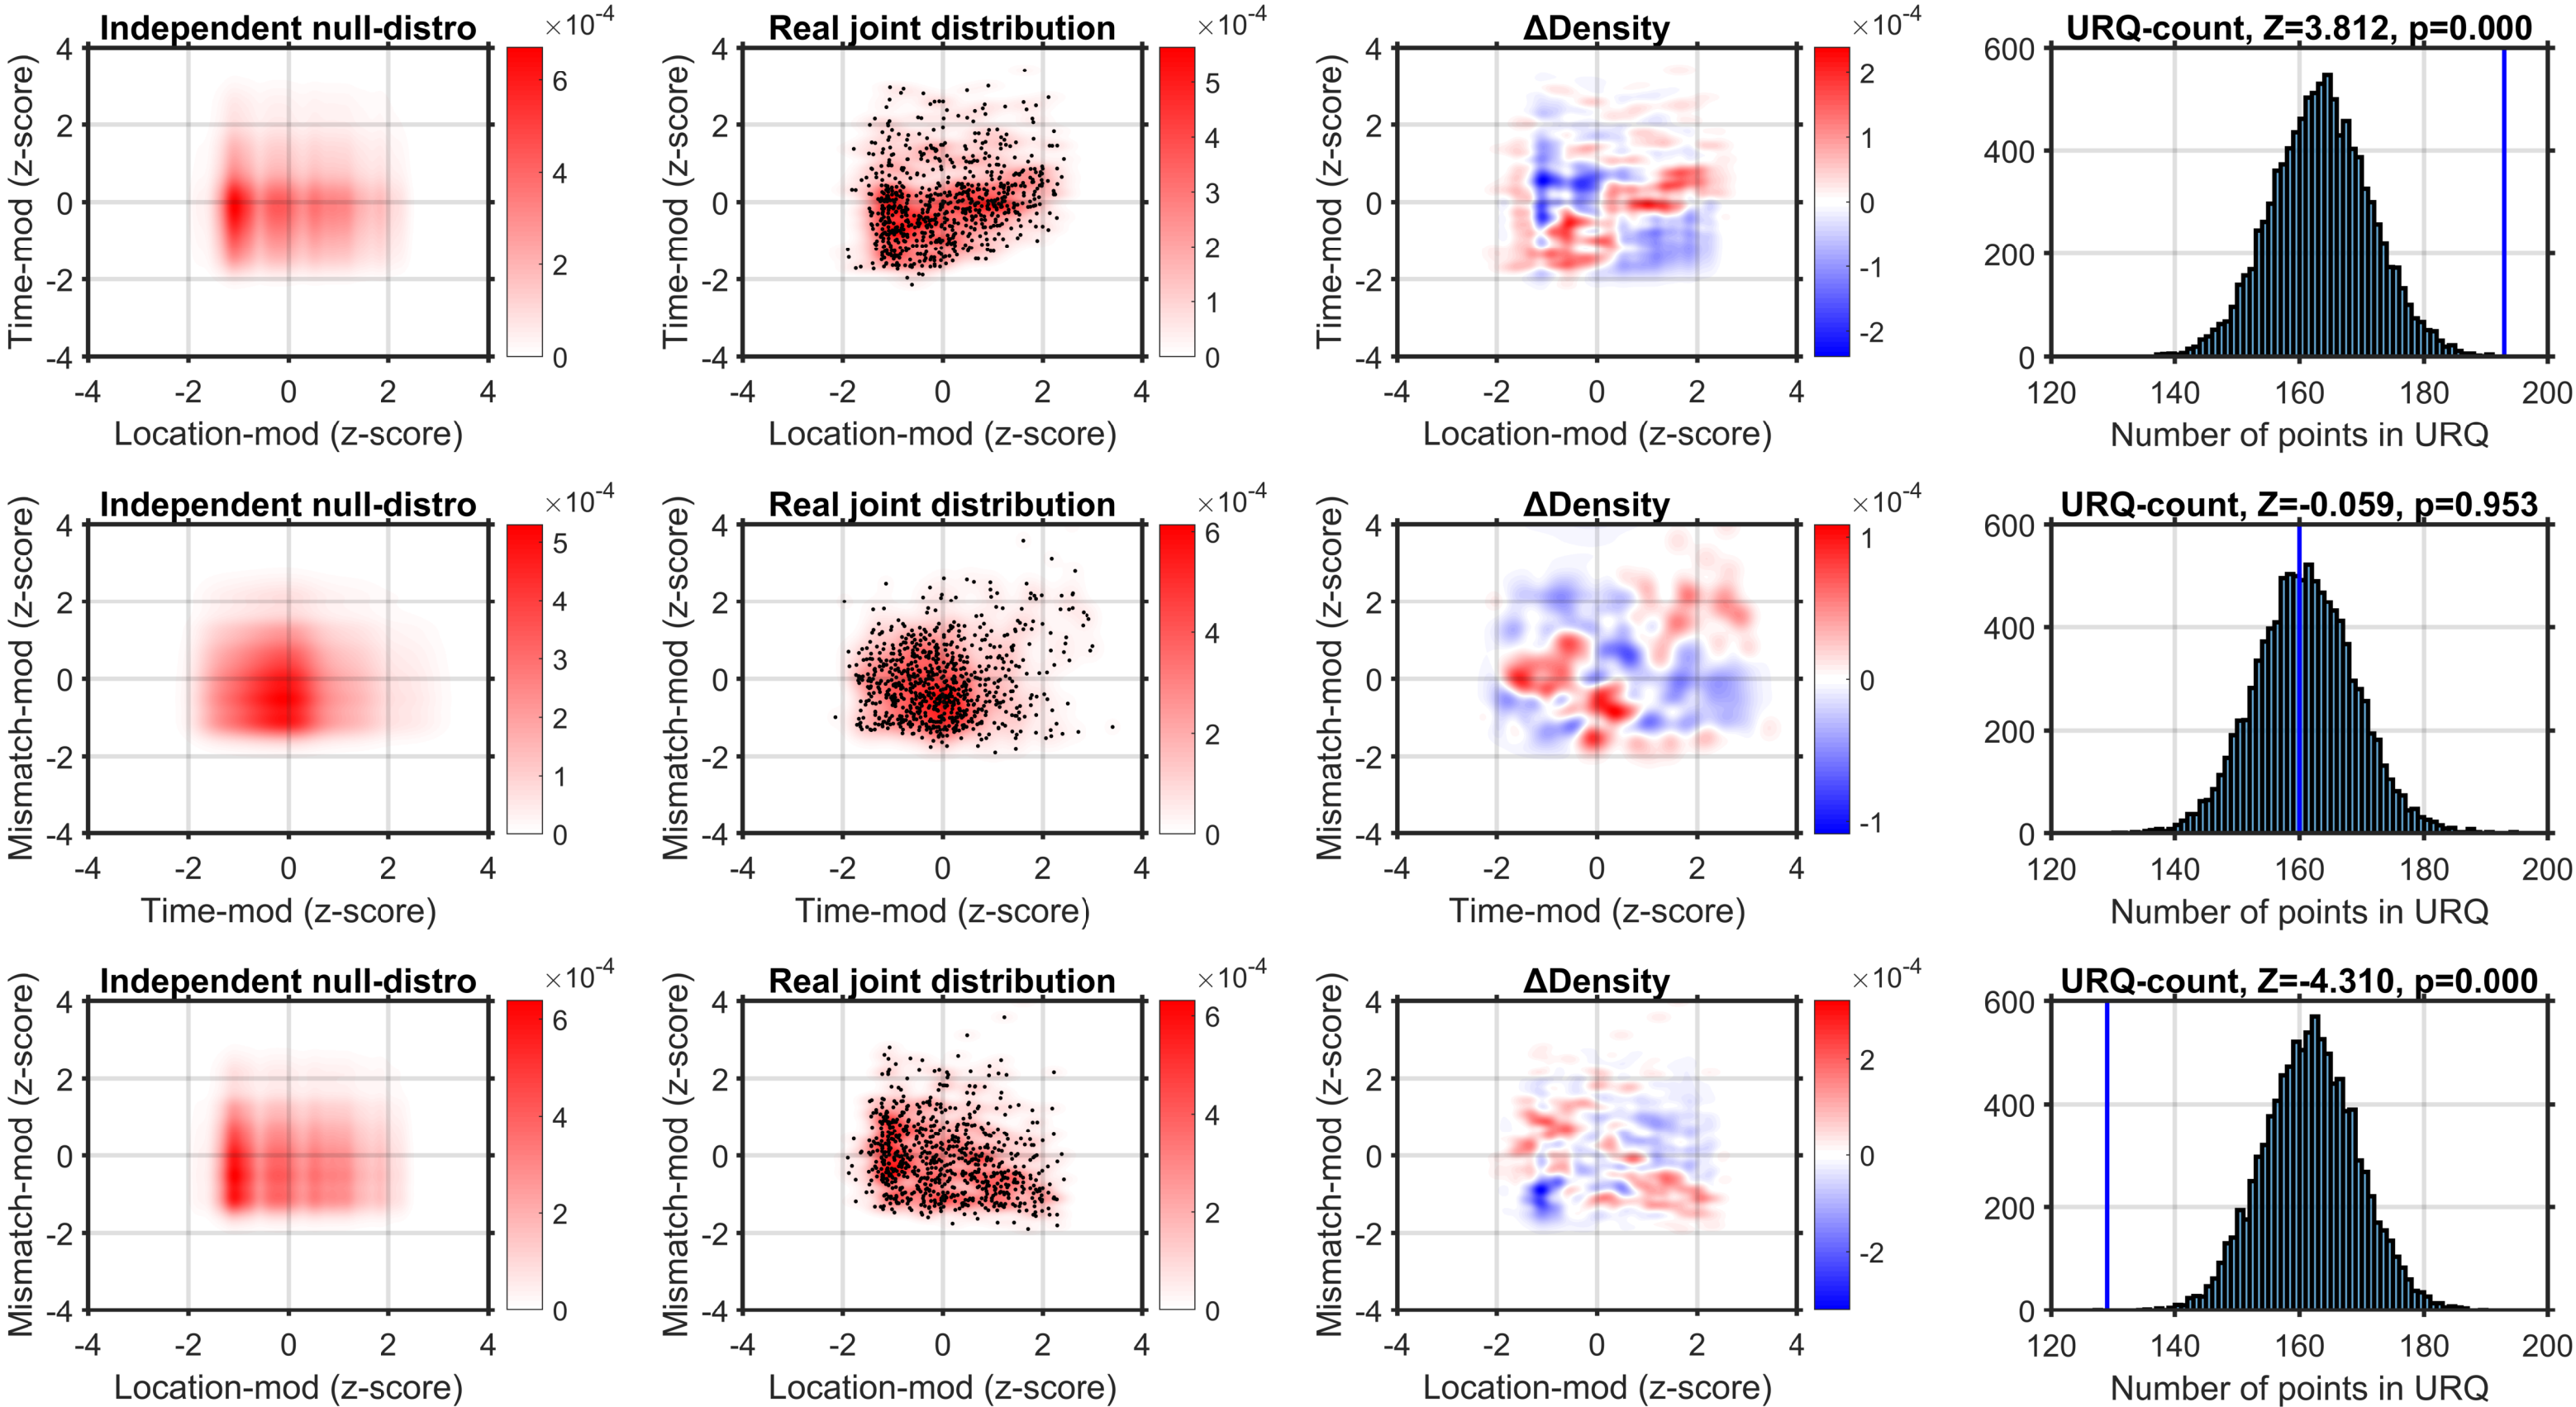

Supplement: supp [file elife-71969-supp-v1.zip]
